# Supplementary material
Source: ML conference proceedings conference paper supplement (https://proceedings.neurips.cc/paper_files/paper/2019/hash/5faf461eff3099671ad63c6f3f094f7f-Abstract.html)
Supplement: Supplementary file [file 5faf461eff3099671ad63c6f3f094f7f-Supplemental.zip]

# Appendices

## A Model-based Policy Optimization with Performance Guarantees

In this appendix, we provide proofs for bounds presented in the main paper.

We begin with a standard bound on model-based policy optimization, with bounded policy change  $\epsilon_\pi$  and model error  $\epsilon_m$ .

**Theorem A.1** (MBPO performance bound). *Let the expected total variation between two transition distributions is bounded at each timestep by  $\max_t E_{s \sim \pi_{D,t}}[D_{TV}(p(s'|s, a) || \hat{p}(s'|s, a))] \leq \epsilon_m$ , and the policy divergences are bounded as  $\max_s D_{TV}(\pi_D(a|s) || \pi(a|s)) \leq \epsilon_\pi$ . Then the returns are bounded as:*

$$\eta[\pi] \geq \hat{\eta}[\pi] - \frac{2\gamma r_{\max}(\epsilon_m + 2\epsilon_\pi)}{(1 - \gamma)^2} - \frac{4r_{\max}\epsilon_\pi}{(1 - \gamma)}$$

*Proof.* Let  $\pi_D$  denote the data collecting policy. As-is we can use Lemma B.3 to bound the returns, but it will require bounded model error under the new policy  $\pi$ . Thus, we need to introduce  $\pi_D$  by adding and subtracting  $\eta[\pi_D]$ , to get:

$$\eta[\pi] - \hat{\eta}[\pi] = \underbrace{\eta[\pi] - \eta[\pi_D]}_{L_1} + \underbrace{\eta[\pi_D] - \hat{\eta}[\pi]}_{L_2}$$

We can bound  $L_1$  and  $L_2$  both using Lemma B.3.

For  $L_1$ , we apply Lemma B.3 using  $\delta = \epsilon_\pi$  (no model error because both terms are under the true model), and obtain:

$$L_1 \geq -\frac{2r_{\max}\gamma\epsilon_\pi}{(1 - \gamma)^2} - \frac{2r_{\max}\epsilon_\pi}{1 - \gamma}$$

For  $L_2$ , we apply Lemma B.3 using  $\delta = \epsilon_\pi + \epsilon_m$  and obtain:

$$L_2 \geq -\frac{2r_{\max}\gamma(\epsilon_m + \epsilon_\pi)}{(1 - \gamma)^2} - \frac{2r_{\max}\epsilon_\pi}{1 - \gamma}$$

Adding these two bounds together yields the desired result.  $\square$

Next, we describe bounds for branched rollouts. We define a branched rollout as a rollout which begins under some policy and dynamics (either true or learned), and at some point in time switches to rolling out under a new policy and dynamics for  $k$  steps. The point at which the branch is selected is weighted exponentially in time – that is, the probability of a branch point  $t$  being selected is proportional to  $\gamma^t$ .

We first present the simpler bound where the model error is bounded under the new policy, which we label as  $\epsilon_{m'}$ . This bound is difficult to apply in practice as supervised learning will typically control model error under the dataset collected by the previous policy.

**Theorem A.2.** *Let the expected total variation between two the learned model is bounded at each timestep under the expectation of  $\pi$  by  $\max_t E_{s \sim \pi_t}[D_{TV}(p(s'|s, a) || \hat{p}(s'|s, a))] \leq \epsilon_{m'}$ , and the policy divergences are bounded as  $\max_s D_{TV}(\pi_D(a|s) || \pi(a|s)) \leq \epsilon_\pi$ . Then under a branched rollouts scheme with a branch length of  $k$ , the returns are bounded as:*

$$\eta[\pi] \geq \eta^{\text{branch}}[\pi] - 2r_{\max} \left[ \frac{\gamma^{k+1}\epsilon_\pi}{(1 - \gamma)^2} + \frac{\gamma^k\epsilon_\pi}{(1 - \gamma)} + \frac{k}{1 - \gamma}(\epsilon_{m'}) \right]$$

*Proof.* As in the proof for Theorem A.1, the proof for this theorem requires adding and subtracting the correct reference quantity and applying the corresponding returns bound (Lemma B.4).

The choice of reference quantity is a branched rollout which executes the old policy  $\pi_D$  under the true dynamics until the branch point, then executes the new policy  $\pi$  under the true dynamics for  $k$  steps. We denote the returns under this scheme as  $\eta^{\pi_D, \pi}$ . We can split the returns as follows:

$$\eta[\pi] - \eta^{\text{branch}} = \underbrace{\eta[\pi] - \eta^{\pi_D, \pi}}_{L_1} + \underbrace{\eta^{\pi_D, \pi} - \eta^{\text{branch}}}_{L_2}$$

416 We can bound both terms  $L_1$  and  $L_2$  using Lemma B.4.

417  $L_1$  accounts for the error from executing the old policy instead of the current policy. This term only  
 418 suffers from error *before* the branch begins, and we can use Lemma B.4  $\epsilon_\pi^{\text{pre}} \leq \epsilon_\pi$  and all other errors  
 419 set to 0. This implies:

$$|\eta[\pi] - \eta^{\pi_D, \pi}| \leq 2r_{\max} \left[ \frac{\gamma^{k+1}}{(1-\gamma)^2} \epsilon_\pi + \frac{\gamma^k}{1-\gamma} \epsilon_\pi \right]$$

420  $L_2$  incorporates model error *under the new policy* incurred after the branch. Again we use Lemma B.4,  
 421 setting  $\epsilon_m^{\text{post}} \leq \epsilon_m$  and all other errors set to 0. This implies:

$$|\eta[\pi] - \eta^{\pi_D, \pi}| \leq 2r_{\max} \left[ \frac{k}{1-\gamma} \epsilon_{m'} \right]$$

422 Adding  $L_1$  and  $L_2$  together completes the proof.

423 □

424 The next bound is an analogue of Theorem A.2 except using model errors under the previous policy  
 425  $\pi_D$  rather than the new policy  $\pi$ .

426 **Theorem A.3.** *Let the expected total variation between two the learned model is bounded at each*  
 427 *timestep under the expectation of  $\pi$  by  $\max_t E_{s \sim \pi_{D,t}} [D_{TV}(p(s'|s, a) || \hat{p}(s'|s, a))] \leq \epsilon_m$ , and the*  
 428 *policy divergences are bounded as  $\max_s D_{TV}(\pi_D(a|s) || \pi(a|s)) \leq \epsilon_\pi$ . Then under a branched*  
 429 *rollouts scheme with a branch length of  $k$ , the returns are bounded as:*

$$\eta[\pi] \geq \eta^{\text{branch}}[\pi] - 2r_{\max} \left[ \frac{\gamma^{k+1} \epsilon_\pi}{(1-\gamma)^2} + \frac{\gamma^k + 2}{(1-\gamma)} \epsilon_\pi + \frac{k}{1-\gamma} (\epsilon_m + 2\epsilon_\pi) \right]$$

430 *Proof.* This proof is a short extension of the proof for Theorem A.2. The only modification is that  
 431 we need to bound  $L_2$  in terms of the model error under the  $\pi_D$  rather than  $\pi$ .

432 Once again, we design a new reference rollout. We use a rollout that executes the old policy  $\pi_D$   
 433 under the true dynamics until the branch point, then executes the *old* policy  $\pi_D$  under the model for  
 434  $k$  steps. We denote the returns under this scheme as  $\eta^{\pi_D, \pi_D}$ . We can split  $L_2$  as follows:

$$\eta^{\pi_D, \pi} - \eta^{\text{branch}} = \underbrace{\eta^{\pi_D, \pi} - \eta^{\pi_D, \pi_D}}_{L_3} + \underbrace{\eta^{\pi_D, \pi_D} - \eta^{\text{branch}}}_{L_4}$$

435 Once again, we bound both terms  $L_3$  and  $L_4$  using Lemma B.4.

436 The rollouts in  $L_3$  differ in both model and policy after the branch. This can be bound using  
 437 Lemma B.4 by setting  $\epsilon_\pi^{\text{post}} = \epsilon_\pi$  and  $\epsilon_m^{\text{post}} = \epsilon_m$ . This results in:

$$|\eta^{\pi_D, \pi} - \eta^{\pi_D, \pi_D}| \leq 2r_{\max} \left[ \frac{k}{1-\gamma} (\epsilon_m + \epsilon_\pi) + \frac{1}{1-\gamma} \epsilon_\pi \right]$$

438 The rollouts in  $L_4$  differ only in the policy after the branch (as they both rollout under the model).  
 439 This can be bound using Lemma B.4 by setting  $\epsilon_\pi^{\text{post}} = \epsilon_\pi$  and  $\epsilon_m^{\text{post}} = 0$ . This results in:

$$|\eta^{\pi_D, \pi_D} - \eta^{\text{branch}}| \leq 2r_{\max} \left[ \frac{k}{1-\gamma} (\epsilon_\pi) + \frac{1}{1-\gamma} \epsilon_\pi \right]$$

440 Adding  $L_1$  from Theorem A.2 and  $L_3, L_4$  above completes the proof.

441 □

## 442 B Useful Lemmas

443 In this section, we provide proofs for various lemmas used in our bounds.

444 **Lemma B.1** (TVD of Joint Distributions). *Suppose we have two distributions  $p_1(x, y) =$   
445  $p_1(x)p_1(y|x)$  and  $p_2(x, y) = p_2(x)p_2(y|x)$ . We can bound the total variation distance of the  
446 joint as:*

$$D_{TV}(p_1(x, y)||p_2(x, y)) \leq D_{TV}(p_1(x)||p_2(x)) + \max_x D_{TV}(p_1(y|x)||p_2(y|x))$$

447 Alternatively, we have a tighter bound in terms of the expected TVD of the conditional:

$$D_{TV}(p_1(x, y)||p_2(x, y)) \leq D_{TV}(p_1(x)||p_2(x)) + E_{x \sim p_1}[D_{TV}(p_1(y|x)||p_2(y|x))]$$

*Proof.*

$$\begin{aligned} D_{TV}(p_1(x, y)||p_2(x, y)) &= \frac{1}{2} \sum_{x, y} |p_1(x, y) - p_2(x, y)| \\ &= \frac{1}{2} \sum_{x, y} |p_1(x)p_1(y|x) - p_2(x)p_2(y|x)| \\ &= \frac{1}{2} \sum_{x, y} |p_1(x)p_1(y|x) - p_1(x)p_2(y|x) + (p_1(x) - p_2(x))p_2(y|x)| \\ &\leq \frac{1}{2} \sum_{x, y} p_1(x)|p_1(y|x) - p_2(y|x)| + |p_1(x) - p_2(x)|p_2(y|x) \\ &= \frac{1}{2} \sum_{x, y} p_1(x)|p_1(y|x) - p_2(y|x)| + \frac{1}{2} \sum_x |p_1(x) - p_2(x)| \\ &= E_{x \sim p_1}[D_{TV}(p_1(y|x)||p_2(y|x))] + D_{TV}(p_1(x)||p_2(x)) \\ &\leq \max_x D_{TV}(p_1(y|x)||p_2(y|x)) + D_{TV}(p_1(x)||p_2(x)) \end{aligned}$$

448 □

449 **Lemma B.2** (Markov chain TVD bound, time-varying). *Suppose the expected KL-divergence between  
450 two transition distributions is bounded as  $\max_t E_{s \sim p_1^t(s)} D_{KL}(p_1(s'|s)||p_2(s'|s)) \leq \delta$ , and the  
451 initial state distributions are the same –  $p_1^{t=0}(s) = p_2^{t=0}(s)$ . Then the distance in the state marginal  
452 is bounded as:*

$$D_{TV}(p_1^t(s)||p_2^t(s)) \leq t\delta$$

453 *Proof.* We begin by bounding the TVD in state-visitation at time  $t$ , which is denoted as  $\epsilon_t =$   
454  $D_{TV}(p_1^t(s)||p_2^t(s))$ .

$$\begin{aligned} |p_1^t(s) - p_2^t(s)| &= \left| \sum_{s'} p_1(s_t = s|s')p_1^{t-1}(s') - p_2(s_t = s|s')p_2^{t-1}(s') \right| \\ &\leq \sum_{s'} |p_1(s_t = s|s')p_1^{t-1}(s') - p_2(s_t = s|s')p_2^{t-1}(s')| \\ &= \sum_{s'} |p_1(s|s')p_1^{t-1}(s') - p_2(s|s')p_1^{t-1}(s') + p_2(s|s')p_1^{t-1}(s') - p_2(s|s')p_2^{t-1}(s')| \\ &\leq \sum_{s'} p_1^{t-1}(s')|p_1(s|s') - p_2(s|s')| + p_2(s|s')|p_1^{t-1}(s') - p_2^{t-1}(s')| \\ &= E_{s' \sim p_1^{t-1}}[|p_1(s|s') - p_2(s|s')|] + \sum_{s'} p(s|s')|p_1^{t-1}(s') - p_2^{t-1}(s')| \end{aligned}$$

$$\begin{aligned}
\epsilon_t &= D_{TV}(p_1^t(s)||p_2^t(s)) = \frac{1}{2} \sum_s |p_1^t(s) - p_2^t(s)| \\
&= \frac{1}{2} \sum_s \left( E_{s' \sim p_1^{t-1}} [|p_1(s|s') - p_2(s|s')|] + \sum_{s'} p(s|s') |p_1^{t-1}(s') - p_2^{t-1}(s')| \right) \\
&= \frac{1}{2} E_{s' \sim p_1^{t-1}} \left[ \sum_s |p_1(s|s') - p_2(s|s')| \right] + D_{TV}(p_1^{t-1}(s')||p_2^{t-1}(s')) \\
&= \delta_t + \epsilon_{t-1} \\
&= \epsilon_0 + \sum_{i=0}^t \delta_i \\
&= \sum_{i=0}^t \delta_i = t\delta
\end{aligned}$$

Where we have defined  $\delta_t = \frac{1}{2} E_{s' \sim p_1^{t-1}} [\sum_s |p_1(s|s') - p_2(s|s')|]$ , which we assume is upper bounded by  $\delta$ . Assuming we are not modeling the initial state distribution, we can set  $\epsilon_0 = 0$ .  $\square$

**Lemma B.3** (Branched Returns bound). *Suppose the expected KL-divergence between two dynamics distributions is bounded as  $\max_t E_{s \sim p_1^t(s)} D_{KL}(p_1(s', a|s)||p_2(s', a|s)) \leq \epsilon_m$ , and  $\max_s D_{TV}(\pi_1(a|s)||\pi_2(a|s)) \leq \epsilon_\pi$ . Then the returns are bounded as:*

$$|\eta_1 - \eta_2| \leq \frac{2R\gamma(\epsilon_\pi + \epsilon_m)}{(1 - \gamma)^2} + \frac{2R\epsilon_\pi}{1 - \gamma}$$

*Proof.* Here,  $\eta_1$  denotes returns of  $\pi_1$  under dynamics  $p_1(s'|s, a)$ , and  $\eta_2$  denotes returns of  $\pi_2$  under dynamics  $p_2(s'|s, a)$ .

$$\begin{aligned}
|\eta_1 - \eta_2| &= \left| \sum_{s,a} (p_1(s, a) - p_2(s, a)) r(s, a) \right| \\
&= \left| \sum_{s,a} \left( \sum_t \gamma^t p_1^t(s, a) - p_2^t(s, a) \right) r(s, a) \right| \\
&= \left| \sum_t \sum_{s,a} \gamma^t (p_1^t(s, a) - p_2^t(s, a)) r(s, a) \right| \\
&\leq \sum_t \sum_{s,a} \gamma^t |p_1^t(s, a) - p_2^t(s, a)| r(s, a) \\
&\leq r_{\max} \sum_t \sum_{s,a} \gamma^t |p_1^t(s, a) - p_2^t(s, a)|
\end{aligned}$$

We now apply Lemma B.2, using  $\delta = \epsilon_m + \epsilon_\pi$  (via Lemma B.1) to get:

$$D_{TV}(p_1^t(s)||p_2^t(s)) \leq t(\epsilon_m + \epsilon_\pi)$$

And since we assume  $\max_s D_{TV}(\pi_1(a|s)||\pi_2(a|s)) \leq \epsilon_\pi$ , we get

$$D_{TV}(p_1^t(s, a)||p_2^t(s, a)) \leq t(\epsilon_m + \epsilon_\pi) + \epsilon_\pi$$

Thus, plugging this back in we get:

$$\begin{aligned}
|\eta_1 - \eta_2| &\leq r_{\max} \sum_t \sum_{s,a} \gamma^t |p_1^t(s, a) - p_2^t(s, a)| \\
&\leq 2r_{\max} \sum_t \gamma^t t(\epsilon_m + \epsilon_\pi) + \epsilon_\pi \\
&\leq 2r_{\max} \left( \frac{\gamma(\epsilon_\pi + \epsilon_m)}{(1 - \gamma)^2} + \frac{\epsilon_\pi}{1 - \gamma} \right)
\end{aligned}$$

467 **Lemma B.4** (Returns bound, branched rollout). Assume we run a branched rollout of length  
 468  $k$ . Before the branch (“pre” branch), we assume that the dynamics distributions are  
 469 bounded as  $\max_t E_{s \sim p_1^t(s)} D_{KL}(p_1^{\text{pre}}(s', a|s) || p_2^{\text{pre}}(s', a|s)) \leq \epsilon_m^{\text{pre}}$  and after the branch as  
 470  $\max_t E_{s \sim p_1^t(s)} D_{KL}(p_1^{\text{post}}(s', a|s) || p_2^{\text{post}}(s', a|s)) \leq \epsilon_m^{\text{post}}$ . Likewise, the policy divergence is  
 471 bounded pre- and post- branch by  $\epsilon_\pi^{\text{pre}}$  and  $\epsilon_\pi^{\text{post}}$ , respectively. Then the  $K$ -step returns are bounded  
 472 as:

$$|\eta_1 - \eta_2| \leq 2r_{\max} \left[ \frac{\gamma^{k+1}}{(1-\gamma)^2} (\epsilon_m^{\text{pre}} + \epsilon_\pi^{\text{pre}}) + \frac{k}{1-\gamma} (\epsilon_m^{\text{post}} + \epsilon_\pi^{\text{post}}) + \frac{\gamma^k}{1-\gamma} \epsilon_\pi^{\text{pre}} + \frac{1}{1-\gamma} \epsilon_\pi^{\text{post}} \right]$$

473 *Proof.* We begin by bounding state marginals at each timestep, similar to Lemma B.3. Recall that  
 474 Lemma B.2 implies that state marginal error at each timestep can be bounded by the state marginal  
 475 error at the previous timestep, plus the divergence at the current timestep.

476 Thus, letting  $d_1(s, a)$  and  $d_2(s, a)$  denote the state-action marginals, we can write:

477 For  $t \leq k$ :

$$TV d_1^t(s, a) d_2^t(s, a) \leq t(\epsilon_m^{\text{post}} + \epsilon_\pi^{\text{post}}) + \epsilon_\pi^{\text{post}} \leq k(\epsilon_m^{\text{post}} + \epsilon_\pi^{\text{post}}) + \epsilon_\pi^{\text{post}}$$

478 and for  $t \geq k$ :

$$TV d_1^t(s, a) d_2^t(s, a) \leq (t-k)(\epsilon_m^{\text{pre}} + \epsilon_\pi^{\text{pre}}) + k(\epsilon_m^{\text{post}} + \epsilon_\pi^{\text{post}}) + \epsilon_\pi^{\text{pre}} + \epsilon_\pi^{\text{post}}$$

479 We can now bound the difference in occupancy measures by averaging the state marginal error over  
 480 time, weighted by the discount:

$$\begin{aligned} D_{TV}(d_1(s, a) || d_2(s, a)) &\leq (1-\gamma) \sum_{t=0}^{\infty} \gamma^t t D_{TV}(d_1^t(s, a) || d_2^t(s, a)) \\ &\leq (1-\gamma) \sum_{t=0}^k \gamma^t (k(\epsilon_m^{\text{post}} + \epsilon_\pi^{\text{post}}) + \epsilon_\pi^{\text{post}}) \\ &\quad + (1-\gamma) \sum_{t=k}^{\infty} \gamma^t (t-k)(\epsilon_m^{\text{pre}} + \epsilon_\pi^{\text{pre}}) + k(\epsilon_m^{\text{post}} + \epsilon_\pi^{\text{post}}) + \epsilon_\pi^{\text{pre}} + \epsilon_\pi^{\text{post}} \\ &= k(\epsilon_m^{\text{post}} + \epsilon_\pi^{\text{post}} + \epsilon_\pi^{\text{post}}) + \frac{\gamma^{k+1}}{1-\gamma} (\epsilon_m^{\text{pre}} + \epsilon_\pi^{\text{pre}}) + \gamma^k \epsilon_\pi^{\text{pre}} \end{aligned}$$

481 Multiplying this bound by  $\frac{2r_{\max}}{1-\gamma}$  to convert the state-marginal bound into a returns bound completes  
 482 the proof.  $\square$

483 **C Hyperparameter Settings**

|     |                                  | HalfCheetah                             | Walker2d | Ant                                                 | Hopper                                              |
|-----|----------------------------------|-----------------------------------------|----------|-----------------------------------------------------|-----------------------------------------------------|
| $N$ | epochs                           | 400                                     | 300      |                                                     | 125                                                 |
| $E$ | environment steps per epoch      | 1000                                    |          |                                                     |                                                     |
| $M$ | model rollouts per policy update | 20                                      |          |                                                     |                                                     |
| $B$ | ensemble size                    | 7                                       |          |                                                     |                                                     |
|     | network architecture             | MLP with four hidden layers of size 200 |          |                                                     |                                                     |
| $G$ | policy updates per epoch         | 40000                                   | 20000    |                                                     |                                                     |
| $k$ | model horizon                    | 1                                       |          | 1 $\rightarrow$ 25 over epochs 20 $\rightarrow$ 100 | 1 $\rightarrow$ 15 over epochs 20 $\rightarrow$ 100 |

Table 1: Hyperparameter settings for MBPO results shown in Figure 2.  $x \rightarrow y$  over epochs  $a \rightarrow b$  denotes a thresholded linear function, *i.e.* at epoch  $e$ ,  $f(e) = \min(\max(x + \frac{e-a}{b-a} \cdot (x-y), x), y)$
